# Supplementary material
Source: PubMed Central journal article supplement (PMC6276982)

**Supplementary Table 1.** Characteristics of participants who agreed to participate and those who did not agree to participate

|                                    | Did not agree to participate | Agreed to participate | p      |
|------------------------------------|------------------------------|-----------------------|--------|
| Participants                       | 506                          | 1394                  |        |
| Women, n (%)                       | 334 (66.3)                   | 733 (52.6)            | <0.001 |
| Age, mean (SD)                     | 77.6 (27.2)                  | 77.7 (5.0)            | 0.91   |
| <i>Education, n (%)</i>            |                              |                       | <0.001 |
| Primary education                  | 44 (9.0)                     | 71 (5.2)              |        |
| Lower education                    | 241 (49.1)                   | 560 (40.9)            |        |
| Intermediate education             | 145 (29.5)                   | 447 (32.7)            |        |
| Higher education                   | 61 (12.4)                    | 291 (21.3)            |        |
| <i>BMI, n (%)</i>                  |                              |                       | 0.53   |
| Normal weight                      | 156 (31.3)                   | 409 (29.4)            |        |
| Overweight                         | 217 (43.5)                   | 646 (46.4)            |        |
| Obese                              | 126 (25.3)                   | 338 (24.3)            |        |
| <i>Smoking, n (%)</i>              |                              |                       | 0.008  |
| Non smoker                         | 195 (38.7)                   | 473 (34.0)            |        |
| Former smoker                      | 268 (53.2)                   | 842 (60.5)            |        |
| Current smoker                     | 41 (8.1)                     | 77 (5.5)              |        |
| <i>Alcohol use, n (%)</i>          |                              |                       | 0.002  |
| Never drinks alcohol               | 104 (20.6)                   | 213 (15.3)            |        |
| Drinks 1-4 times per month         | 160 (31.7)                   | 400 (28.7)            |        |
| Drinks 2-4 times per week          | 240 (47.6)                   | 779 (56.0)            |        |
| <i>Health status</i>               |                              |                       | <0.001 |
| Not disabled                       | 177 (35.1)                   | 632 (45.4)            |        |
| Disabled                           | 116 (23.0)                   | 258 (18.5)            |        |
| Severely disabled                  | 211 (41.9)                   | 502 (36.1)            |        |
| Prevalent CVD, DM or cancer, n (%) | 266 (52.6)                   | 734 (52.7)            | 1.00   |
| Living with partner, n (%)         | 269 (53.4)                   | 904 (64.9)            | <0.001 |

Abbreviations: BMI, body mass index; CVD, cardiovascular disease; DM, diabetes mellitus; n, number; SD, standard deviation. Body mass index was calculated as weight in kilograms divided by height in meters squared. Categories were defined as normal weight:  $18.5 < 25 \text{ kg/m}^2$ , overweight:  $25 < 30 \text{ kg/m}^2$  and obese:  $\geq 30 \text{ kg/m}^2$ .

Total N varies due to variation in the amount of missing data for different covariates.

**Supplementary Table 2.** Characteristics of men and women included in the study

|                                    | Men        | Women      | p      |
|------------------------------------|------------|------------|--------|
| n                                  | 582        | 628        |        |
| Age, mean (SD)                     | 77.4 (4.8) | 77.7 (5.1) | 0.28   |
| <i>Education, n (%)</i>            |            |            | <0.001 |
| Primary education                  | 22 ( 3.8)  | 41 ( 6.7)  |        |
| Lower education                    | 46 (25.5)  | 337 (54.7) |        |
| Intermediate education             | 224 (39.2) | 163 (26.5) |        |
| Higher education                   | 180 (31.5) | 75 (12.2)  |        |
| <i>BMI, n (%)</i>                  |            |            | 0.001  |
| Normal weight                      | 167 (28.7) | 183 (29.2) |        |
| Overweight                         | 298 (51.2) | 265 (42.3) |        |
| Obese                              | 117 (20.1) | 179 (28.5) |        |
| <i>Smoking, n (%)</i>              |            |            | <0.001 |
| Non smoker                         | 127 (21.9) | 282 (44.9) |        |
| Former smoker                      | 425 (73.3) | 310 (49.4) |        |
| Current smoker                     | 28 ( 4.8)  | 36 ( 5.7)  |        |
| <i>Alcohol use, n (%)</i>          |            |            | <0.001 |
| Never drinks alcohol               | 66 (11.4)  | 123 (19.6) |        |
| Drinks 1-4 times per month         | 128 (22.0) | 217 (34.6) |        |
| Drinks 2-4 times per week          | 387 (66.6) | 288 (45.9) |        |
| <i>Health status, n (%)</i>        |            |            | <0.001 |
| Not disabled                       | 302 (52.0) | 243 (38.8) |        |
| Disabled                           | 87 (15.0)  | 139 (22.2) |        |
| Severely disabled                  | 192 (33.0) | 245 (39.1) |        |
| Prevalent CVD, DM or cancer, n (%) | 350 (60.1) | 292 (46.5) | <0.001 |
| Living with partner, n (%)         | 481 (82.8) | 319 (50.8) | <0.001 |

Abbreviations: BMI, body mass index; CVD, cardiovascular disease; DM, diabetes mellitus; n, number; SD, standard deviation. Body mass index was calculated as weight in kilograms divided by height in meters squared. Categories were defined as normal weight:  $18.5 < 25 \text{ kg/m}^2$ , overweight:  $25 < 30 \text{ kg/m}^2$  and obese:  $\geq 30 \text{ kg/m}^2$ .

Total N varies due to variation in the amount of missing data for different covariates.

**Supplementary Table 3.** Objectively assessed moderate and vigorous intensity physical activity in women  
(n=628)

|                            | n   | Moderate PA<br>(min/day), mean (SD) | Vigorous PA (min/day), median<br>(interquartile range) | Total sedentary<br>time (h/day)* |
|----------------------------|-----|-------------------------------------|--------------------------------------------------------|----------------------------------|
| Total                      | 628 | 61.3 (19.2)                         | 8.8 [17.1, 17.1]                                       | 20.0 (0.9)                       |
| <i>Age group</i>           |     |                                     |                                                        |                                  |
| 70-74                      | 200 | 68.6 (19.8)                         | 10.9 [20.3, 20.3]                                      | 19.8 (0.9)                       |
| 75-79                      | 226 | 61.4 (17.8)                         | 9.2 [16.7, 16.7]                                       | 20.0 (0.9)                       |
| 80-84                      | 130 | 56.2 (16.5)                         | 7.9 [14.4, 14.4]                                       | 20.2 (0.9)                       |
| ≥85                        | 72  | 49.9 (18.4)                         | 6.2 [11.5, 11.5]                                       | 20.5 (1.0)                       |
| p                          |     | <0.001                              | <0.001                                                 | <0.001                           |
| <i>Education</i>           |     |                                     |                                                        |                                  |
| Primary education          | 41  | 53.3 (19.8)                         | 7.1 [15.6, 15.6]                                       | 20.4 (0.9)                       |
| Lower education            | 337 | 61.0 (18.3)                         | 9.2 [17.1, 17.1]                                       | 20.0 (0.9)                       |
| Intermediate education     | 163 | 60.6 (19.1)                         | 8.3 [16.3, 16.3]                                       | 20.1 (0.9)                       |
| Higher education           | 75  | 66.9 (20.5)                         | 10.2 [19.0, 19.0]                                      | 19.8 (1.0)                       |
| p                          |     | 0.003                               | 0.02                                                   | 0.006                            |
| <i>Season</i>              |     |                                     |                                                        |                                  |
| Spring                     | 163 | 61.1 (18.8)                         | 13.0 [9.1, 17.5]                                       | 20.0 (1.0)                       |
| Summer                     | 74  | 63.4 (20.4)                         | 13.0 [9.8, 18.2]                                       | 20.0 (1.0)                       |
| Autumn                     | 206 | 60.0 (20.5)                         | 11.9 [8.0, 16.1]                                       | 20.1 (1.0)                       |
| Winter                     | 182 | 61.7 (17.5)                         | 12.9 [9.0, 16.7]                                       | 20.0 (0.9)                       |
| p                          |     | 0.60                                | 0.19                                                   | 0.73                             |
| <i>BMI</i>                 |     |                                     |                                                        |                                  |
| Normal weight              | 183 | 68.3 (19.1)                         | 10.9 [19.7, 19.7]                                      | 19.7 (0.9)                       |
| Overweight                 | 265 | 61.6 (19.1)                         | 8.7 [17.2, 17.2]                                       | 20.0 (1.0)                       |
| Obese                      | 179 | 54.0 (16.6)                         | 8.1 [14.4, 14.4]                                       | 20.4 (0.8)                       |
| p                          |     | <0.001                              | <0.001                                                 | <0.001                           |
| <i>Smoking</i>             |     |                                     |                                                        |                                  |
| Non smoker                 | 282 | 62.7 (19.1)                         | 8.8 [17.4, 17.4]                                       | 20.0 (0.9)                       |
| Former smoker              | 310 | 60.5 (19.2)                         | 8.8 [16.6, 16.6]                                       | 20.1 (0.9)                       |
| Current smoker             | 36  | 57.5 (20.0)                         | 8.4 [16.6, 16.6]                                       | 20.3 (1.0)                       |
| p                          |     | 0.19                                | 0.48                                                   | 0.05                             |
| <i>Alcohol consumption</i> |     |                                     |                                                        |                                  |
| Never drinks alcohol       | 123 | 59.3 (17.7)                         | 8.4 [15.9, 15.9]                                       | 20.1 (1.0)                       |
| Drinks 1-4 times per month | 217 | 58.7 (18.8)                         | 8.3 [16.0, 16.0]                                       | 20.2 (0.9)                       |
| Drinks 2-4 times per week  | 288 | 64.2 (19.8)                         | 9.3 [18.2, 18.2]                                       | 19.9 (0.9)                       |
| p                          |     | 0.003                               | 0.02                                                   | 0.005                            |
| <i>Health status</i>       |     |                                     |                                                        |                                  |
| Not disabled               | 243 | 65.9 (19.0)                         | 10.1 [19.4, 19.4]                                      | 19.9 (0.9)                       |

|                                    |     |             |                  |            |
|------------------------------------|-----|-------------|------------------|------------|
| Disabled                           | 139 | 62.9 (18.2) | 9.8 [17.3, 17.3] | 20.0 (0.9) |
| Severely disabled                  | 245 | 55.8 (18.8) | 7.7 [15.5, 15.5] | 20.2 (1.0) |
| p                                  |     | <0.001      | <0.001           | <0.001     |
| <i>Prevalent CVD, DM or cancer</i> |     |             |                  |            |
| Not present                        | 336 | 64.6 (19.1) | 13.5 [9.8, 18.1] | 19.9 (0.9) |
| Present                            | 292 | 57.5 (18.7) | 11.9 [8.1, 15.8] | 20.2 (1.0) |
| p                                  |     | <0.001      | <0.001           | <0.001     |
| <i>Marital status</i>              |     |             |                  |            |
| Living alone                       | 309 | 57.2 (19.0) | 11.6 (7.8, 15.3) | 20.2 (1.0) |
| Living with partner                | 319 | 65.3 (18.6) | 13.7 (9.9, 18.6) | 19.9 (0.9) |
| p                                  |     | <0.001      | <0.001           | <0.001     |

Abbreviations: BMI, body mass index; CVD, cardiovascular disease; DM, diabetes mellitus; n, number; SD, standard deviation. Body mass index was calculated as weight in kilograms divided by height in meters squared. Categories were defined as normal weight:  $18.5 < 25 \text{ kg/m}^2$ , overweight:  $25 < 30 \text{ kg/m}^2$  and obese:  $\geq 30 \text{ kg/m}^2$ .

Data are mean (SD) or median (interquartile range).

Total N varies due to variation in the amount of missing data for different covariates.

\* Total sedentary time is the sum of sedentary time while awake and sleep time.

**Supplementary Table 4.** Objectively assessed moderate and vigorous intensity physical activity in men  
(n=582)

|                            | n   | Moderate PA<br>(min/day), mean (SD) | Vigorous PA (min/day), median<br>(interquartile range) | Total sedentary<br>time (h/day)* |
|----------------------------|-----|-------------------------------------|--------------------------------------------------------|----------------------------------|
| Total                      | 582 | 58.3 (18.6)                         | 8.7 [16.8, 16.8]                                       | 20.4 (0.9)                       |
| <i>Age group</i>           |     |                                     |                                                        |                                  |
| 70-74                      | 201 | 61.1 (18.9)                         | 10.4 [18.8, 18.8]                                      | 20.3 (0.9)                       |
| 75-79                      | 203 | 60.9 (17.8)                         | 9.8 [17.0, 17.0]                                       | 20.3 (0.9)                       |
| 80-84                      | 130 | 54.3 (17.6)                         | 7.5 [13.9, 13.9]                                       | 20.5 (0.9)                       |
| ≥85                        | 48  | 46.2 (17.4)                         | 5.9 [10.1, 10.1]                                       | 20.8 (0.9)                       |
| p                          |     | <0.001                              | <0.001                                                 | 0.001                            |
| <i>Education</i>           |     |                                     |                                                        |                                  |
| Primary education          | 22  | 51.3 (15.2)                         | 7.5 [12.6, 12.6]                                       | 20.6 (0.9)                       |
| Lower education            | 146 | 57.9 (18.2)                         | 8.3 [17.8, 17.8]                                       | 20.4 (0.8)                       |
| Intermediate education     | 224 | 58.0 (18.9)                         | 8.5 [16.2, 16.2]                                       | 20.4 (0.9)                       |
| Higher education           | 180 | 59.4 (19.1)                         | 9.1 [17.6, 17.6]                                       | 20.3 (0.9)                       |
| p                          |     | 0.28                                | 0.13                                                   | 0.59                             |
| <i>Season</i>              |     |                                     |                                                        |                                  |
| Spring                     | 140 | 55.4 (17.9)                         | 11.5 [7.6, 15.8]                                       | 20.5 (0.8)                       |
| Summer                     | 64  | 62.2 (20.4)                         | 13.8 [10.4, 19.3]                                      | 20.2 (1.0)                       |
| Autumn                     | 163 | 59.5 (18.9)                         | 12.4 [8.7, 16.6]                                       | 20.3 (0.9)                       |
| Winter                     | 213 | 58.2 (18.2)                         | 11.8 [8.9, 16.9]                                       | 20.4 (0.9)                       |
| p                          |     | 0.073                               | 0.057                                                  | 0.065                            |
| <i>BMI</i>                 |     |                                     |                                                        |                                  |
| Normal weight              | 167 | 62.7 (20.0)                         | 8.8 [19.5, 19.5]                                       | 20.2 (0.9)                       |
| Overweight                 | 298 | 58.5 (17.1)                         | 9.4 [16.5, 16.5]                                       | 20.3 (0.9)                       |
| Obese                      | 117 | 51.4 (18.6)                         | 6.8 [14.0, 14.0]                                       | 20.7 (0.9)                       |
| p                          |     | <0.001                              | <0.001                                                 | <0.001                           |
| <i>Smoking</i>             |     |                                     |                                                        |                                  |
| Non smoker                 | 127 | 58.6 (18.1)                         | 9.4 [16.8, 16.8]                                       | 20.4 (0.9)                       |
| Former smoker              | 425 | 58.6 (18.7)                         | 8.8 [17.0, 17.0]                                       | 20.3 (0.9)                       |
| Current smoker             | 28  | 51.3 (20.0)                         | 6.2 [13.6, 13.6]                                       | 20.6 (1.1)                       |
| p                          |     | 0.13                                | 0.11                                                   | 0.31                             |
| <i>Alcohol consumption</i> |     |                                     |                                                        |                                  |
| Never drinks alcohol       | 66  | 59.3 (22.8)                         | 7.4 [15.7, 15.7]                                       | 20.2 (1.0)                       |
| Drinks 1-4 times per month | 128 | 56.0 (17.4)                         | 8.9 [16.1, 16.1]                                       | 20.5 (0.9)                       |
| Drinks 2-4 times per week  | 387 | 58.8 (18.2)                         | 9.0 [17.0, 17.0]                                       | 20.3 (0.9)                       |
| p                          |     | 0.30                                | 0.48                                                   | 0.09                             |
| <i>Health status</i>       |     |                                     |                                                        |                                  |
| Not disabled               | 302 | 62.8 (18.0)                         | 10.5 [18.7, 18.7]                                      | 20.2 (0.9)                       |

|                                    |     |             |                   |            |
|------------------------------------|-----|-------------|-------------------|------------|
| Disabled                           | 87  | 53.9 (17.5) | 7.0 [14.2, 14.2]  | 20.5 (0.9) |
| Severely disabled                  | 192 | 53.1 (18.3) | 7.4 [14.5, 14.5]  | 20.6 (0.9) |
| p                                  |     | <0.001      | <0.001            | <0.001     |
| <i>Prevalent CVD, DM or cancer</i> |     |             |                   |            |
| Not present                        | 232 | 62.1 (17.1) | 13.5 [10.3, 18.5] | 20.2 (0.8) |
| Present                            | 350 | 55.8 (19.2) | 11.0 [7.7, 15.4]  | 20.5 (0.9) |
| p                                  |     | <0.001      | <0.001            | 0.001      |
| <i>Marital status</i>              |     |             |                   |            |
| Living alone                       | 100 | 55.0 (19.7) | 10.5 (7.3, 13.6)  | 20.4 (0.9) |
| Living with partner                | 481 | 58.9 (18.4) | 12.7 (9.1, 17.1)  | 20.3 (0.9) |
| p                                  |     | 0.05        | 0.001             | 0.36       |

Abbreviations: BMI, body mass index; CVD, cardiovascular disease; DM, diabetes mellitus; n, number; SD, standard deviation. Body mass index was calculated as weight in kilograms divided by height in meters squared. Categories were defined as normal weight:  $18.5 < 25 \text{ kg/m}^2$ , overweight:  $25 < 30 \text{ kg/m}^2$  and obese:  $\geq 30 \text{ kg/m}^2$ .

Data are mean (SD) or median (interquartile range).

Total N varies due to variation in the amount of missing data for different covariates.

\* Total sedentary time is the sum of sedentary time while awake and sleep time.

**Supplementary Table 5.** Objectively assessed physical activity subcomponents and sedentary time in women, expressed in percentages of awake time (n=628)

|                            | n   | Sedentary  | Light PA   | Moderate PA | Vigorous PA    | Moderate-to-vigorous PA |
|----------------------------|-----|------------|------------|-------------|----------------|-------------------------|
| Total                      | 628 | 77.6 (5.6) | 14.9 (3.3) | 6.2 (2)     | 1.3 [0.9, 1.7] | 7.5 (2.6)               |
| <i>Age group</i>           |     |            |            |             |                |                         |
| 70-74                      | 200 | 76.7 (5.4) | 15.0 (3.0) | 6.7 (1.9)   | 1.5 [1.1, 2.0] | 8.3 (2.6)               |
| 75-79                      | 226 | 77.6 (5.3) | 14.9 (3.2) | 6.2 (1.8)   | 1.3 [0.9, 1.7] | 7.6 (2.4)               |
| 80-84                      | 130 | 78.0 (5.4) | 15.0 (3.4) | 5.8 (1.8)   | 1.1 [0.8, 1.5] | 7.0 (2.3)               |
| ≥85                        | 72  | 79.5 (6.7) | 14.2 (4.0) | 5.3 (2.2)   | 0.9 [0.7, 1.2] | 6.3 (2.8)               |
| p                          |     | 0.003      | 0.37       | <0.001      | <0.001         | <0.001                  |
| <i>Education</i>           |     |            |            |             |                |                         |
| Primary education          | 41  | 79.8 (6.1) | 13.7 (3.5) | 5.4 (2.2)   | 0.9 [0.7, 1.4] | 6.6 (2.8)               |
| Lower education            | 337 | 77.6 (5.3) | 14.9 (3.2) | 6.2 (1.8)   | 1.3 [0.9, 1.7] | 7.5 (2.4)               |
| Intermediate education     | 163 | 77.7 (5.7) | 14.8 (3.3) | 6.1 (2.0)   | 1.2 [0.9, 1.7] | 7.5 (2.7)               |
| Higher education           | 75  | 76.4 (6.0) | 15.5 (3.5) | 6.6 (2.1)   | 1.4 [1.0, 1.9] | 8.1 (2.7)               |
| p                          |     | 0.02       | 0.04       | 0.02        | 0.01           | 0.02                    |
| <i>Season</i>              |     |            |            |             |                |                         |
| Spring                     | 163 | 77.6 (5.7) | 14.8 (3.3) | 6.2 (2.0)   | 1.3 [0.9, 1.8] | 7.6 (2.6)               |
| Summer                     | 74  | 77.5 (5.5) | 14.8 (3.3) | 6.3 (2.0)   | 1.3 [1.0, 1.7] | 7.7 (2.6)               |
| Autumn                     | 206 | 77.5 (6.1) | 15.0 (3.6) | 6.2 (2.1)   | 1.2 [0.8, 1.6] | 7.5 (2.8)               |
| Winter                     | 182 | 77.9 (4.9) | 14.7 (2.9) | 6.1 (1.7)   | 1.3 [0.9, 1.7] | 7.4 (2.3)               |
| p                          |     | 0.89       | 0.80       | 0.87        | 0.45           | 0.82                    |
| <i>BMI</i>                 |     |            |            |             |                |                         |
| Normal weight              | 183 | 75.3 (5.2) | 16.2 (3.0) | 7.0 (1.9)   | 1.5 [1.1, 2.0] | 8.6 (2.6)               |
| Overweight                 | 265 | 77.5 (5.6) | 14.9 (3.3) | 6.2 (2.0)   | 1.3 [0.9, 1.7] | 7.6 (2.6)               |
| Obese                      | 179 | 80.1 (4.8) | 13.5 (3.0) | 5.3 (1.6)   | 1.1 [0.8, 1.4] | 6.5 (2.1)               |
| p                          |     | <0.001     | <0.001     | <0.001      | <0.001         | <0.001                  |
| <i>Smoking</i>             |     |            |            |             |                |                         |
| Non smoker                 | 282 | 76.9 (5.4) | 15.3 (3.2) | 6.4 (1.9)   | 1.3 [0.9, 1.8] | 7.8 (2.5)               |
| Former smoker              | 310 | 78.1 (5.5) | 14.5 (3.2) | 6.1 (1.9)   | 1.2 [0.9, 1.7] | 7.4 (2.6)               |
| Current smoker             | 36  | 79.0 (6.7) | 14.0 (3.8) | 5.8 (2.3)   | 1.2 [0.8, 1.7] | 7.1 (3.0)               |
| p                          |     | 0.01       | 0.004      | 0.08        | 0.25           | 0.12                    |
| <i>Alcohol consumption</i> |     |            |            |             |                |                         |
| Never drinks alcohol       | 123 | 78.1 (5.3) | 14.7 (3.2) | 6.0 (1.8)   | 1.2 [0.9, 1.6] | 7.3 (2.3)               |
| Drinks 1-4 times per month | 217 | 78.4 (5.6) | 14.4 (3.3) | 5.9 (1.9)   | 1.2 [0.8, 1.6] | 7.2 (2.5)               |
| Drinks 2-4 times per week  | 288 | 76.8 (5.6) | 15.3 (3.3) | 6.4 (2.0)   | 1.3 [0.9, 1.8] | 7.9 (2.7)               |
| p                          |     | 0.005      | 0.009      | 0.007       | 0.02           | 0.006                   |
| <i>Health status</i>       |     |            |            |             |                |                         |

|                                    |     |            |            |           |                |           |
|------------------------------------|-----|------------|------------|-----------|----------------|-----------|
| Not disabled                       | 243 | 76.8 (5.1) | 15.2 (3.0) | 6.6 (1.8) | 1.4 [1.0, 1.9] | 8.1 (2.5) |
| Disabled                           | 139 | 77.0 (5.2) | 15.3 (3.1) | 6.4 (1.8) | 1.3 [1.0, 1.7] | 7.8 (2.5) |
| Severely disabled                  | 245 | 78.8 (6.0) | 14.3 (3.6) | 5.7 (2.0) | 1.1 [0.8, 1.6] | 6.9 (2.6) |
| p                                  |     | <0.001     | 0.006      | <0.001    | <0.001         | <0.001    |
| <i>Prevalent CVD, DM or cancer</i> |     |            |            |           |                |           |
| Not present                        | 336 | 76.8 (5.5) | 15.2 (3.2) | 6.5 (1.9) | 1.4 [1.0, 1.8] | 8.0 (2.6) |
| Present                            | 292 | 78.5 (5.6) | 14.4 (3.3) | 5.8 (1.9) | 1.2 [0.8, 1.6] | 7.1 (2.5) |
| p                                  |     | <0.001     | 0.002      | <0.001    | <0.001         | <0.001    |
| <i>Marital status</i>              |     |            |            |           |                |           |
| Living alone                       | 309 | 78.6 (6.0) | 14.3 (3.5) | 5.8 (2.0) | 1.2 (0.8, 1.6) | 7.1 (2.7) |
| Living with partner                | 319 | 76.7 (5.0) | 15.4 (2.9) | 6.5 (1.8) | 1.4 (1.0, 1.8) | 8.0 (2.4) |
| p                                  |     | <0.001     | <0.001     | <0.001    | <0.001         | <0.001    |

Abbreviations: BMI, body mass index; CVD, cardiovascular disease; DM, diabetes mellitus; n, number; SD, standard deviation. Body mass index was calculated as weight in kilograms divided by height in meters squared. Categories were defined as normal weight:  $18.5 < 25 \text{ kg/m}^2$ , overweight:  $25 < 30 \text{ kg/m}^2$  and obese:  $\geq 30 \text{ kg/m}^2$ .

Data are mean (SD) or median (interquartile range).

Total N varies due to variation in the amount of missing data for different covariates.



**Supplementary Table 6.** Objectively assessed physical activity subcomponents and sedentary time in men, expressed in percentages of awake time (n=582)

|                            | n   | Sedentary  | Light PA   | Moderate PA | Vigorous PA    | Moderate-to-vigorous PA |
|----------------------------|-----|------------|------------|-------------|----------------|-------------------------|
| Total                      | 582 | 79.1 (5.3) | 13.9 (3.2) | 5.7 (1.8)   | 1.2 [0.9, 1.7] | 7.0 (2.4)               |
| <i>Age group</i>           |     |            |            |             |                |                         |
| 70-74                      | 201 | 79.2 (5.3) | 13.5 (3.1) | 5.9 (1.9)   | 1.3 [1.0, 1.8] | 7.3 (2.5)               |
| 75-79                      | 203 | 78.4 (5.0) | 14.2 (3.0) | 6.0 (1.7)   | 1.2 [1.0, 1.7] | 7.4 (2.3)               |
| 80-84                      | 130 | 79.5 (5.2) | 13.9 (3.3) | 5.5 (1.7)   | 1.0 [0.8, 1.4] | 6.6 (2.2)               |
| ≥85                        | 48  | 80.5 (5.9) | 13.9 (3.9) | 4.8 (1.9)   | 0.8 [0.5, 1.0] | 5.6 (2.3)               |
| p                          |     | 0.05       | 0.15       | <0.001      | <0.001         | <0.001                  |
| <i>Education</i>           |     |            |            |             |                |                         |
| Primary education          | 22  | 79.9 (6.1) | 13.8 (4.3) | 5.3 (1.7)   | 1.0 [0.7, 1.3] | 6.3 (2.1)               |
| Lower education            | 146 | 79.2 (4.7) | 13.8 (2.8) | 5.7 (1.7)   | 1.1 [0.9, 1.7] | 7.0 (2.3)               |
| Intermediate education     | 224 | 79.1 (5.5) | 13.9 (3.4) | 5.8 (1.9)   | 1.2 [0.9, 1.6] | 7.0 (2.4)               |
| Higher education           | 180 | 79.0 (5.3) | 13.9 (3.2) | 5.8 (1.9)   | 1.2 [0.9, 1.7] | 7.2 (2.5)               |
| p                          |     | 0.89       | 1.00       | 0.61        | 0.27           | 0.49                    |
| <i>Season</i>              |     |            |            |             |                |                         |
| Spring                     | 140 | 79.9 (4.9) | 13.5 (2.9) | 5.5 (1.7)   | 1.2 [0.8, 1.5] | 6.7 (2.3)               |
| Summer                     | 64  | 77.5 (5.7) | 14.7 (3.5) | 6.3 (2.0)   | 1.4 [1.1, 1.8] | 7.8 (2.6)               |
| Autumn                     | 163 | 78.4 (5.6) | 14.3 (3.5) | 6.0 (1.9)   | 1.2 [0.9, 1.7] | 7.3 (2.5)               |
| Winter                     | 213 | 79.5 (4.9) | 13.6 (3.0) | 5.6 (1.7)   | 1.2 [0.9, 1.6] | 6.9 (2.2)               |
| p                          |     | 0.005      | 0.01       | 0.005       | 0.01           | 0.006                   |
| <i>BMI</i>                 |     |            |            |             |                |                         |
| Normal weight              | 167 | 77.8 (5.4) | 14.5 (3.2) | 6.2 (2.0)   | 1.3 [0.9, 1.9] | 7.6 (2.6)               |
| Overweight                 | 298 | 78.9 (5.0) | 14.0 (3.1) | 5.8 (1.7)   | 1.2 [0.9, 1.6] | 7.1 (2.2)               |
| Obese                      | 117 | 81.3 (5.2) | 12.7 (3.1) | 5.0 (1.8)   | 1.0 [0.7, 1.4] | 6.0 (2.3)               |
| p                          |     | <0.001     | <0.001     | <0.001      | <0.001         | <0.001                  |
| <i>Smoking</i>             |     |            |            |             |                |                         |
| Non smoker                 | 127 | 79.2 (4.9) | 13.7 (2.8) | 5.8 (1.8)   | 1.2 [0.9, 1.7] | 7.1 (2.4)               |
| Former smoker              | 425 | 78.9 (5.3) | 14.0 (3.3) | 5.8 (1.8)   | 1.2 [0.9, 1.7] | 7.1 (2.4)               |
| Current smoker             | 28  | 81.2 (5.9) | 12.7 (3.5) | 5.0 (2.0)   | 1.0 [0.6, 1.4] | 6.1 (2.5)               |
| p                          |     | 0.07       | 0.07       | 0.11        | 0.09           | 0.10                    |
| <i>Alcohol consumption</i> |     |            |            |             |                |                         |
| Never drinks alcohol       | 66  | 78.3 (5.9) | 14.5 (3.3) | 5.9 (2.3)   | 1.1 [0.7, 1.7] | 7.2 (3.0)               |
| Drinks 1-4 times per month | 128 | 80.1 (4.9) | 13.2 (3.1) | 5.5 (1.7)   | 1.2 [0.9, 1.6] | 6.7 (2.2)               |
| Drinks 2-4 times per week  | 387 | 78.9 (5.2) | 14.0 (3.2) | 5.8 (1.8)   | 1.2 [0.9, 1.7] | 7.1 (2.3)               |
| p                          |     | 0.05       | 0.02       | 0.17        | 0.42           | 0.26                    |
| <i>Health status</i>       |     |            |            |             |                |                         |

|                                    |     |            |            |           |                |           |
|------------------------------------|-----|------------|------------|-----------|----------------|-----------|
| Not disabled                       | 302 | 78.2 (4.9) | 14.2 (2.9) | 6.1 (1.7) | 1.3 [1.0, 1.8] | 7.6 (2.3) |
| Disabled                           | 87  | 79.6 (5.7) | 13.8 (3.6) | 5.4 (1.9) | 1.0 [0.7, 1.4] | 6.6 (2.4) |
| Severely disabled                  | 192 | 80.1 (5.4) | 13.4 (3.4) | 5.3 (1.8) | 1.1 [0.7, 1.4] | 6.4 (2.4) |
| p                                  |     | <0.001     | 0.03       | <0.001    | <0.001         | <0.001    |
| <i>Prevalent CVD, DM or cancer</i> |     |            |            |           |                |           |
| Not present                        | 232 | 78.2 (4.9) | 14.3 (2.9) | 6.1 (1.7) | 1.3 [1.1, 1.8] | 7.5 (2.3) |
| Present                            | 350 | 79.7 (5.4) | 13.6 (3.3) | 5.5 (1.9) | 1.1 [0.8, 1.5] | 6.7 (2.4) |
| p                                  |     | 0.001      | 0.02       | <0.001    | <0.001         | <0.001    |
| Marital status                     |     |            |            |           |                |           |
| Living alone                       | 100 | 79.5 (5.6) | 13.9 (3.4) | 5.5 (2.0) | 1.0 (0.7, 1.5) | 6.7 (2.6) |
| Living with partner                | 481 | 79.0 (5.2) | 13.9 (3.1) | 5.8 (1.8) | 1.2 (0.9, 1.7) | 7.1 (2.3) |
| p                                  |     | 0.42       | 1.00       | 0.12      | 0.002          | 0.07      |

Abbreviations: BMI, body mass index; CVD, cardiovascular disease; DM, diabetes mellitus; n, number; SD, standard deviation. Body mass index was calculated as weight in kilograms divided by height in meters squared. Categories were defined as normal weight:  $18.5 < 25 \text{ kg/m}^2$ , overweight:  $25 < 30 \text{ kg/m}^2$  and obese:  $\geq 30 \text{ kg/m}^2$ .

Data are mean (SD) or median (interquartile range).

Total N varies due to variation in the amount of missing data for different covariates.

**Supplementary Table 7.** The association between physical activity measures and demographic and health factors in participants aged less than 80 years (n=760)

| Variable               | n   | Acceleration (mg/day) |        | Awake sedentary time (h/day) |        | Light PA (min/day) |        | Moderate-vigorous PA (min/day) |        | Sleep time (accelerometer) (h/day) |       |
|------------------------|-----|-----------------------|--------|------------------------------|--------|--------------------|--------|--------------------------------|--------|------------------------------------|-------|
|                        |     | $\beta \pm SE$        | p      | $\beta \pm SE$               | p      | $\beta \pm SE$     | p      | $\beta \pm SE$                 | p      | $\beta \pm SE$                     | p     |
| <i>Age group</i>       |     |                       |        |                              |        |                    |        |                                |        |                                    |       |
| 70-74                  | 378 | Referent              |        | Referent                     |        | Referent           |        | Referent                       |        | Referent                           |       |
| 75-79                  | 382 | -0.78 ± 0.38          | 0.04   | -0.04 ± 0.10                 | 0.67   | 1.81 ± 2.21        | 0.42   | -3.81 ± 1.75                   | 0.03   | 0.06 ± 0.08                        | 0.44  |
| <i>Sex</i>             |     |                       |        |                              |        |                    |        |                                |        |                                    |       |
| Men                    | 372 | Referent              |        | Referent                     |        | Referent           |        | Referent                       |        | Referent                           |       |
| Women                  | 388 | 1.92 ± 0.44           | <0.001 | -0.49 ± 0.11                 | <0.001 | 11.92 ± 2.56       | <0.001 | 8.42 ± 2.02                    | <0.001 | 0.03 ± 0.10                        | 0.79  |
| <i>Education</i>       |     |                       |        |                              |        |                    |        |                                |        |                                    |       |
| Primary education      | 27  | Referent              |        | Referent                     |        | Referent           |        | Referent                       |        | Referent                           |       |
| Lower education        | 310 | 0.46 ± 1.03           | 0.66   | -0.27 ± 0.26                 | 0.31   | 3.71 ± 5.98        | 0.54   | 3.09 ± 4.73                    | 0.51   | 0.14 ± 0.22                        | 0.54  |
| Intermediate education | 238 | 0.29 ± 1.04           | 0.78   | -0.21 ± 0.27                 | 0.43   | 1.79 ± 6.07        | 0.77   | 1.89 ± 4.80                    | 0.69   | 0.12 ± 0.23                        | 0.59  |
| Higher education       | 185 | 0.55 ± 1.07           | 0.60   | -0.10 ± 0.27                 | 0.72   | 5.26 ± 6.20        | 0.40   | 3.78 ± 4.90                    | 0.44   | -0.06 ± 0.23                       | 0.78  |
| <i>Season</i>          |     |                       |        |                              |        |                    |        |                                |        |                                    |       |
| Spring                 | 193 | Referent              |        | Referent                     |        | Referent           |        | Referent                       |        | Referent                           |       |
| Summer                 | 96  | 1.46 ± 0.64           | 0.02   | 0.10 ± 0.16                  | 0.55   | 2.68 ± 3.70        | 0.47   | 4.36 ± 2.93                    | 0.14   | -0.24 ± 0.14                       | 0.09  |
| Autumn                 | 241 | 0.98 ± 0.49           | 0.046  | 0.02 ± 0.13                  | 0.86   | 4.41 ± 2.85        | 0.12   | 2.69 ± 2.26                    | 0.23   | -0.12 ± 0.11                       | 0.28  |
| Winter                 | 230 | 0.61 ± 0.50           | 0.22   | 0.12 ± 0.13                  | 0.36   | 2.95 ± 2.88        | 0.31   | 1.83 ± 2.28                    | 0.42   | -0.19 ± 0.11                       | 0.08  |
| <i>BMI</i>             |     |                       |        |                              |        |                    |        |                                |        |                                    |       |
| Normal weight          | 198 | Referent              |        | Referent                     |        | Referent           |        | Referent                       |        | Referent                           |       |
| Overweight             | 365 | -1.54 ± 0.45          | <0.001 | 0.30 ± 0.12                  | 0.01   | -5.05 ± 2.64       | 0.0557 | -6.63 ± 2.08                   | 0.002  | -0.05 ± 0.10                       | 0.62  |
| Obese                  | 197 | -2.95 ± 0.53          | <0.001 | 0.90 ± 0.14                  | <0.001 | -12.37 ± 3.09      | <0.001 | -13.25 ± 2.45                  | <0.001 | -0.41 ± 0.12                       | 0.001 |
| <i>Smoking</i>         |     |                       |        |                              |        |                    |        |                                |        |                                    |       |
| Non smoker             | 257 | Referent              |        | Referent                     |        | Referent           |        | Referent                       |        | Referent                           |       |
| Former smoker          | 455 | 0.46 ± 0.42           | 0.27   | 0.03 ± 0.11                  | 0.78   | 0.92 ± 2.42        | 0.70   | 2.42 ± 1.91                    | 0.21   | -0.08 ± 0.09                       | 0.36  |
| Current smoker         | 48  | -1.81 ± 0.82          | 0.03   | 0.30 ± 0.21                  | 0.16   | -6.48 ± 4.77       | 0.17   | -7.88 ± 3.77                   | 0.04   | -0.11 ± 0.18                       | 0.55  |

|                                    |     |              |        |              |       |              |        |               |        |              |      |
|------------------------------------|-----|--------------|--------|--------------|-------|--------------|--------|---------------|--------|--------------|------|
| <i>Alcohol consumption</i>         |     |              |        |              |       |              |        |               |        |              |      |
| Never drinks alcohol               | 110 | Referent     |        | Referent     |       | Referent     |        | Referent      |        | Referent     |      |
| Drinks 1-4 times per month         | 206 | 0.24 ± 0.60  | 0.69   | -0.03 ± 0.16 | 0.83  | -2.10 ± 3.5  | 0.55   | 1.25 ± 2.77   | 0.65   | 0.12 ± 0.13  | 0.36 |
| Drinks 2-4 times per week          | 444 | 0.61 ± 0.56  | 0.27   | 0.03 ± 0.14  | 0.83  | 1.38 ± 3.23  | 0.67   | 1.92 ± 2.56   | 0.45   | -0.02 ± 0.12 | 0.89 |
| <i>Health status</i>               |     |              |        |              |       |              |        |               |        |              |      |
| Not disabled                       | 385 | Referent     |        | Referent     |       | Referent     |        | Referent      |        | Referent     |      |
| Disabled                           | 136 | -0.83 ± 0.52 | 0.11   | 0.00 ± 0.13  | 0.99  | -3.31 ± 3.01 | 0.27   | -4.52 ± 2.38  | 0.06   | 0.13 ± 0.11  | 0.26 |
| Severely disabled                  | 239 | -1.80 ± 0.43 | <0.001 | 0.24 ± 0.11  | 0.03  | -9.43 ± 2.51 | <0.001 | -10.23 ± 1.98 | <0.001 | 0.05 ± 0.09  | 0.60 |
| <i>Prevalent CVD, DM or cancer</i> |     |              |        |              |       |              |        |               |        |              |      |
| Not present                        | 389 | Referent     |        | Referent     |       | Referent     |        | Referent      |        | Referent     |      |
| Present                            | 371 | -1.28 ± 0.38 | <0.001 | 0.18 ± 0.1   | 0.07  | -4.69 ± 2.19 | 0.03   | -4.4 ± 1.73   | 0.01   | -0.05 ± 0.08 | 0.56 |
| <i>Marital status</i>              |     |              |        |              |       |              |        |               |        |              |      |
| Living alone                       | 199 | Referent     |        | Referent     |       | Referent     |        | Referent      |        | Referent     |      |
| Living with partner                | 561 | 1.64 ± 0.45  | <0.001 | -0.18 ± 0.12 | 0.120 | 9.17 ± 2.62  | <0.001 | 7.23 ± 2.07   | <0.001 | -0.07 ± 0.10 | 0.47 |
| <i>Sleep medication</i>            |     |              |        |              |       |              |        |               |        |              |      |
| Not using                          | 636 | Referent     |        | Referent     |       | Referent     |        | Referent      |        | Referent     |      |
| Using                              | 124 | 0.00 ± 0.51  | 1.00   | 0.02 ± 0.13  | 0.90  | -0.42 ± 2.96 | 0.89   | -0.92 ± 2.34  | 0.70   | -0.07 ± 0.11 | 0.52 |

**Supplementary Table 8.** The association between physical activity measures and demographic and health factors in participants aged equal or greater than 80 years (n=360)

| Variable               | n   | Acceleration (mg/day) |        | Awake sedentary time (h/day) |        | Light PA (min/day) |        | Moderate-vigorous PA (min/day) |        | Sleep time (accelerometer) (h/day) |      |  |
|------------------------|-----|-----------------------|--------|------------------------------|--------|--------------------|--------|--------------------------------|--------|------------------------------------|------|--|
|                        |     | $\beta \pm SE$        | p      | $\beta \pm SE$               | p      | $\beta \pm SE$     | p      | $\beta \pm SE$                 | p      | $\beta \pm SE$                     | p    |  |
| <i>Age group</i>       |     |                       |        |                              |        |                    |        |                                |        |                                    |      |  |
| 80-84                  | 251 | Referent              |        | Referent                     |        | Referent           |        | Referent                       |        | Referent                           |      |  |
| ≥85                    | 109 | -2.05 ± 0.55          | <0.001 | 0.51 ± 0.16                  | <0.001 | -8.18 ± 3.79       | 0.03   | -10.68 ± 2.57                  | <0.001 | -0.15 ± 0.15                       | 0.30 |  |
| <i>Sex</i>             |     |                       |        |                              |        |                    |        |                                |        |                                    |      |  |
| Men                    | 171 | Referent              |        | Referent                     |        | Referent           |        | Referent                       |        | Referent                           |      |  |
| Women                  | 189 | 0.58 ± 0.58           | 0.31   | -0.41 ± 0.16                 | 0.01   | 4.57 ± 4.00        | 0.25   | 2.18 ± 2.70                    | 0.42   | 0.16 ± 0.16                        | 0.30 |  |
| <i>Education</i>       |     |                       |        |                              |        |                    |        |                                |        |                                    |      |  |
| Primary education      | 33  | Referent              |        | Referent                     |        | Referent           |        | Referent                       |        | Referent                           |      |  |
| Lower education        | 141 | -0.23 ± 0.86          | 0.79   | 0.17 ± 0.24                  | 0.48   | 0.30 ± 5.94        | 0.96   | -2.41 ± 4.02                   | 0.55   | -0.17 ± 0.23                       | 0.47 |  |
| Intermediate education | 128 | 0.01 ± 0.87           | 0.99   | 0.33 ± 0.25                  | 0.18   | -0.21 ± 6.07       | 0.97   | -1.34 ± 4.11                   | 0.74   | -0.29 ± 0.24                       | 0.22 |  |
| Higher education       | 58  | -0.05 ± 1.02          | 0.96   | 0.59 ± 0.29                  | 0.04   | -1.08 ± 7.11       | 0.88   | -2.09 ± 4.81                   | 0.66   | -0.47 ± 0.28                       | 0.09 |  |
| <i>Season</i>          |     |                       |        |                              |        |                    |        |                                |        |                                    |      |  |
| Spring                 | 78  | Referent              |        | Referent                     |        | Referent           |        | Referent                       |        | Referent                           |      |  |
| Summer                 | 20  | 0.93 ± 1.10           | 0.40   | 0.27 ± 0.31                  | 0.39   | 4.09 ± 7.66        | 0.59   | 4.14 ± 5.18                    | 0.42   | -0.35 ± 0.30                       | 0.24 |  |
| Autumn                 | 128 | 0.60 ± 0.64           | 0.35   | -0.21 ± 0.18                 | 0.26   | 5.85 ± 4.43        | 0.19   | 3.72 ± 3.00                    | 0.22   | -0.03 ± 0.17                       | 0.84 |  |
| Winter                 | 134 | 0.17 ± 0.64           | 0.79   | -0.19 ± 0.18                 | 0.30   | 4.30 ± 4.45        | 0.33   | 0.90 ± 3.01                    | 0.77   | 0.07 ± 0.17                        | 0.68 |  |
| <i>BMI</i>             |     |                       |        |                              |        |                    |        |                                |        |                                    |      |  |
| Normal weight          | 122 | Referent              |        | Referent                     |        | Referent           |        | Referent                       |        | Referent                           |      |  |
| Overweight             | 160 | -2.22 ± 0.54          | <0.001 | 0.44 ± 0.15                  | 0.005  | -12.58 ± 3.75      | <0.001 | -9.38 ± 2.53                   | <0.001 | -0.16 ± 0.15                       | 0.28 |  |
| Obese                  | 78  | -4.14 ± 0.67          | <0.001 | 0.90 ± 0.19                  | <0.001 | -24.97 ± 4.67      | <0.001 | -18.58 ± 3.16                  | <0.001 | -0.25 ± 0.18                       | 0.17 |  |
| <i>Smoking</i>         |     |                       |        |                              |        |                    |        |                                |        |                                    |      |  |
| Non smoker             | 123 | Referent              |        | Referent                     |        | Referent           |        | Referent                       |        | Referent                           |      |  |
| Former smoker          | 225 | -0.74 ± 0.52          | 0.16   | 0.18 ± 0.15                  | 0.23   | -2.75 ± 3.62       | 0.45   | -4.10 ± 2.45                   | 0.09   | -0.06 ± 0.14                       | 0.69 |  |
| Current smoker         | 12  | -4.79 ± 1.36          | <0.001 | 0.49 ± 0.39                  | 0.20   | -34.4 ± 9.43       | <0.001 | -23.42 ± 6.38                  | <0.001 | 0.53 ± 0.37                        | 0.15 |  |

|                                    |     |              |        |             |       |              |        |              |        |              |      |  |
|------------------------------------|-----|--------------|--------|-------------|-------|--------------|--------|--------------|--------|--------------|------|--|
| <i>Alcohol consumption</i>         |     |              |        |             |       |              |        |              |        |              |      |  |
| Never drinks alcohol               | 67  | Referent     |        | Referent    |       | Referent     |        | Referent     |        | Referent     |      |  |
| Drinks 1-4 times per month         | 119 | -0.54 ± 0.69 | 0.43   | 0.10 ± 0.19 | 0.59  | -7.69 ± 4.76 | 0.11   | -1.87 ± 3.22 | 0.56   | 0.05 ± 0.18  | 0.78 |  |
| Drinks 2-4 times per week          | 174 | -0.20 ± 0.66 | 0.76   | 0.04 ± 0.19 | 0.83  | -0.17 ± 4.55 | 0.97   | 0.89 ± 3.08  | 0.77   | -0.03 ± 0.18 | 0.87 |  |
| <i>Health status</i>               |     |              |        |             |       |              |        |              |        |              |      |  |
| Not disabled                       | 124 | Referent     |        | Referent    |       | Referent     |        | Referent     |        | Referent     |      |  |
| Disabled                           | 70  | -1.05 ± 0.67 | 0.12   | 0.07 ± 0.19 | 0.70  | 2.03 ± 4.66  | 0.66   | -4.81 ± 3.15 | 0.13   | -0.08 ± 0.18 | 0.67 |  |
| Severely disabled                  | 166 | -1.23 ± 0.57 | 0.03   | 0.22 ± 0.16 | 0.17  | -0.45 ± 3.92 | 0.91   | -4.94 ± 2.65 | 0.06   | -0.12 ± 0.15 | 0.43 |  |
| <i>Prevalent CVD, DM or cancer</i> |     |              |        |             |       |              |        |              |        |              |      |  |
| Not present                        | 134 | Referent     |        | Referent    |       | Referent     |        | Referent     |        | Referent     |      |  |
| Present                            | 226 | -1.68 ± 0.50 | <0.001 | 0.18 ± 0.14 | 0.20  | -9.14 ± 3.47 | 0.01   | -8.39 ± 2.35 | <0.001 | 0.15 ± 0.13  | 0.28 |  |
| <i>Marital status</i>              |     |              |        |             |       |              |        |              |        |              |      |  |
| Living alone                       | 180 | Referent     |        | Referent    |       | Referent     |        | Referent     |        | Referent     |      |  |
| Living with partner                | 180 | -0.24 ± 0.54 | 0.66   | 0.06 ± 0.15 | 0.687 | 0.36 ± 3.75  | 0.9237 | 0.79 ± 2.53  | 0.75   | -0.12 ± 0.15 | 0.42 |  |
| <i>Sleep medication</i>            |     |              |        |             |       |              |        |              |        |              |      |  |
| Not using                          | 298 | Referent     |        | Referent    |       | Referent     |        | Referent     |        | Referent     |      |  |
| Using                              | 62  | -0.57 ± 0.63 | 0.36   | 0.29 ± 0.18 | 0.10  | -3.90 ± 4.36 | 0.37   | -2.14 ± 2.95 | 0.47   | -0.18 ± 0.17 | 0.28 |  |

**Supplementary Table 9.** The association between physical activity measures and demographic and health factors in participants with body mass index less than 27 (n=554)

| Variable                   | n   | Acceleration (mg/day) |        | Awake sedentary time (h/day) |        | Light PA (min/day) |        | Moderate-vigorous PA (min/day) |        | Sleep time (accelerometer) (h/day) |      |  |
|----------------------------|-----|-----------------------|--------|------------------------------|--------|--------------------|--------|--------------------------------|--------|------------------------------------|------|--|
|                            |     | $\beta \pm SE$        | p      | $\beta \pm SE$               | p      | $\beta \pm SE$     | p      | $\beta \pm SE$                 | p      | $\beta \pm SE$                     | p    |  |
| <i>Age group</i>           |     |                       |        |                              |        |                    |        |                                |        |                                    |      |  |
| 70-74                      | 175 | Referent              |        | Referent                     |        | Referent           |        | Referent                       |        | Referent                           |      |  |
| 75-79                      | 185 | -0.97 ± 0.58          | 0.09   | 0.07 ± 0.13                  | 0.62   | 0.84 ± 3.32        | 0.80   | -5.18 ± 2.62                   | 0.048  | 0.03 ± 0.11                        | 0.80 |  |
| 80-84                      | 130 | -1.39 ± 0.65          | 0.03   | 0.03 ± 0.15                  | 0.84   | 0.98 ± 3.74        | 0.79   | -8.36 ± 2.95                   | 0.005  | 0.11 ± 0.13                        | 0.41 |  |
| ≥85                        | 64  | -3.11 ± 0.86          | <0.001 | 0.68 ± 0.20                  | <0.001 | -4.29 ± 4.98       | 0.39   | -17.88 ± 3.93                  | <0.001 | -0.23 ± 0.17                       | 0.18 |  |
| <i>Education</i>           |     |                       |        |                              |        |                    |        |                                |        |                                    |      |  |
| Primary education          | 17  | Referent              |        | Referent                     |        | Referent           |        | Referent                       |        | Referent                           |      |  |
| Lower education            | 207 | -1.03 ± 1.35          | 0.45   | 0.63 ± 0.32                  | 0.05   | -1.82 ± 7.78       | 0.82   | -5.29 ± 6.14                   | 0.39   | -0.41 ± 0.27                       | 0.12 |  |
| Intermediate education     | 188 | -0.85 ± 1.35          | 0.53   | 0.61 ± 0.32                  | 0.05   | -1.40 ± 7.79       | 0.86   | -4.67 ± 6.14                   | 0.45   | -0.45 ± 0.27                       | 0.09 |  |
| Higher education           | 142 | -0.65 ± 1.38          | 0.64   | 0.79 ± 0.32                  | 0.01   | 0.45 ± 7.98        | 0.96   | -3.89 ± 6.29                   | 0.54   | -0.63 ± 0.28                       | 0.02 |  |
| <i>Season</i>              |     |                       |        |                              |        |                    |        |                                |        |                                    |      |  |
| Spring                     | 131 | Referent              |        | Referent                     |        | Referent           |        | Referent                       |        | Referent                           |      |  |
| Summer                     | 61  | 1.60 ± 0.82           | 0.05   | 0.18 ± 0.19                  | 0.36   | 1.57 ± 4.74        | 0.74   | 4.36 ± 3.74                    | 0.24   | -0.25 ± 0.16                       | 0.12 |  |
| Autumn                     | 171 | 0.58 ± 0.62           | 0.34   | -0.04 ± 0.14                 | 0.77   | 5.11 ± 3.55        | 0.15   | 2.09 ± 2.80                    | 0.45   | -0.09 ± 0.12                       | 0.48 |  |
| Winter                     | 191 | 0.04 ± 0.61           | 0.95   | 0.22 ± 0.14                  | 0.13   | 1.51 ± 3.50        | 0.67   | -0.64 ± 2.76                   | 0.82   | -0.22 ± 0.12                       | 0.07 |  |
| <i>Sex</i>                 |     |                       |        |                              |        |                    |        |                                |        |                                    |      |  |
| Men                        | 276 | Referent              |        | Referent                     |        | Referent           |        | Referent                       |        | Referent                           |      |  |
| Women                      | 278 | 1.58 ± 0.55           | 0.005  | -0.43 ± 0.13                 | 0.001  | 9.80 ± 3.19        | 0.002  | 6.99 ± 2.52                    | 0.006  | 0.00 ± 0.11                        | 0.98 |  |
| <i>Smoking</i>             |     |                       |        |                              |        |                    |        |                                |        |                                    |      |  |
| Non smoker                 | 206 | Referent              |        | Referent                     |        | Referent           |        | Referent                       |        | Referent                           |      |  |
| Former smoker              | 318 | -0.51 ± 0.50          | 0.31   | 0.29 ± 0.12                  | 0.01   | -4.24 ± 2.89       | 0.14   | -2.52 ± 2.28                   | 0.27   | -0.19 ± 0.10                       | 0.06 |  |
| Current smoker             | 30  | -3.93 ± 1.08          | <0.001 | 0.46 ± 0.25                  | 0.07   | -19.73 ± 6.24      | <0.001 | -19.19 ± 4.92                  | <0.001 | 0.12 ± 0.22                        | 0.58 |  |
| <i>Alcohol consumption</i> |     |                       |        |                              |        |                    |        |                                |        |                                    |      |  |
| Never drinks alcohol       | 100 | Referent              |        | Referent                     |        | Referent           |        | Referent                       |        | Referent                           |      |  |

|                                    |     |              |        |              |      |              |        |              |       |              |      |
|------------------------------------|-----|--------------|--------|--------------|------|--------------|--------|--------------|-------|--------------|------|
| Drinks 1-4 times per month         | 134 | 0.05 ± 0.70  | 0.95   | 0.00 ± 0.16  | 1.00 | -3.27 ± 4.05 | 0.42   | 0.53 ± 3.19  | 0.87  | 0.07 ± 0.14  | 0.62 |
| Drinks 2-4 times per week          | 320 | 0.19 ± 0.62  | 0.76   | -0.05 ± 0.15 | 0.73 | -1.39 ± 3.59 | 0.70   | 0.75 ± 2.83  | 0.79  | 0.12 ± 0.12  | 0.35 |
| <i>Health status</i>               |     |              |        |              |      |              |        |              |       |              |      |
| Not disabled                       | 300 | Referent     |        | Referent     |      | Referent     |        | Referent     |       | Referent     |      |
| Disabled                           | 85  | -0.31 ± 0.66 | 0.64   | -0.02 ± 0.15 | 0.88 | -1.21 ± 3.79 | 0.75   | -2.83 ± 2.99 | 0.34  | 0.06 ± 0.13  | 0.62 |
| Severely disabled                  | 169 | -1.45 ± 0.53 | 0.01   | 0.12 ± 0.12  | 0.34 | -6.69 ± 3.04 | 0.03   | -7.64 ± 2.39 | 0.002 | 0.05 ± 0.11  | 0.62 |
| <i>Prevalent CVD, DM or cancer</i> |     |              |        |              |      |              |        |              |       |              |      |
| Not present                        | 276 | Referent     |        | Referent     |      | Referent     |        | Referent     |       | Referent     |      |
| Present                            | 278 | -1.78 ± 0.46 | <0.001 | 0.08 ± 0.11  | 0.48 | -8.27 ± 2.66 | <0.001 | -6.57 ± 2.1  | 0.002 | 0.16 ± 0.09  | 0.08 |
| <i>Marital status</i>              |     |              |        |              |      |              |        |              |       |              |      |
| Living alone                       | 185 | Referent     |        | Referent     |      | Referent     |        | Referent     |       | Referent     |      |
| Living with parnter                | 369 | 0.53 ± 0.55  | 0.34   | 0.08 ± 0.13  | 0.53 | 3.60 ± 3.19  | 0.26   | 2.81 ± 2.52  | 0.26  | -0.17 ± 0.11 | 0.13 |
| <i>Sleep medication</i>            |     |              |        |              |      |              |        |              |       |              |      |
| Not using                          | 457 | Referent     |        | Referent     |      | Referent     |        | Referent     |       | Referent     |      |
| Using                              | 97  | -0.28 ± 0.61 | 0.65   | 0.02 ± 0.14  | 0.87 | -2.77 ± 3.49 | 0.43   | -2.51 ± 2.75 | 0.36  | -0.02 ± 0.12 | 0.84 |



**Supplementary Table 10.** The association between physical activity measures and demographic and health factors in participants with body mass index equal or higher than 27 (n=566)

| Variable                   | n   | Acceleration (mg/day) |        | Awake sedentary time (h/day) |       | Light PA (min/day) |       | Moderate-vigorous PA (min/day) |        | Sleep time (accelerometer) (h/day) |      |  |
|----------------------------|-----|-----------------------|--------|------------------------------|-------|--------------------|-------|--------------------------------|--------|------------------------------------|------|--|
|                            |     | $\beta \pm SE$        | p      | $\beta \pm SE$               | p     | $\beta \pm SE$     | p     | $\beta \pm SE$                 | p      | $\beta \pm SE$                     | p    |  |
| <i>Age group</i>           |     |                       |        |                              |       |                    |       |                                |        |                                    |      |  |
| 70-74                      | 203 | Referent              |        | Referent                     |       | Referent           |       | Referent                       |        | Referent                           |      |  |
| 75-79                      | 197 | -0.60 ± 0.46          | 0.20   | -0.16 ± 0.14                 | 0.25  | 2.10 ± 3.06        | 0.49  | -2.48 ± 2.21                   | 0.26   | 0.12 ± 0.12                        | 0.33 |  |
| 80-84                      | 121 | -2.33 ± 0.55          | <0.001 | 0.06 ± 0.17                  | 0.73  | -5.07 ± 3.65       | 0.16  | -11.26 ± 2.63                  | <0.001 | 0.08 ± 0.15                        | 0.58 |  |
| ≥85                        | 45  | -3.70 ± 0.82          | <0.001 | 0.22 ± 0.24                  | 0.36  | -9.40 ± 5.37       | 0.08  | -18.42 ± 3.87                  | <0.001 | 0.14 ± 0.22                        | 0.53 |  |
| <i>Education</i>           |     |                       |        |                              |       |                    |       |                                |        |                                    |      |  |
| Primary education          | 43  | Referent              |        | Referent                     |       | Referent           |       | Referent                       |        | Referent                           |      |  |
| Lower education            | 244 | 0.62 ± 0.76           | 0.42   | -0.33 ± 0.23                 | 0.15  | 3.62 ± 5.04        | 0.47  | 2.61 ± 3.64                    | 0.47   | 0.13 ± 0.20                        | 0.52 |  |
| Intermediate education     | 178 | 0.42 ± 0.79           | 0.60   | -0.15 ± 0.24                 | 0.52  | 0.97 ± 5.21        | 0.85  | 1.31 ± 3.76                    | 0.73   | 0.09 ± 0.21                        | 0.69 |  |
| Higher education           | 101 | 0.68 ± 0.87           | 0.44   | -0.16 ± 0.26                 | 0.54  | 4.66 ± 5.75        | 0.42  | 3.46 ± 4.15                    | 0.40   | -0.02 ± 0.23                       | 0.93 |  |
| <i>Season</i>              |     |                       |        |                              |       |                    |       |                                |        |                                    |      |  |
| Spring                     | 140 | Referent              |        | Referent                     |       | Referent           |       | Referent                       |        | Referent                           |      |  |
| Summer                     | 55  | 0.74 ± 0.73           | 0.31   | 0.08 ± 0.22                  | 0.71  | 2.39 ± 4.81        | 0.62  | 2.76 ± 3.47                    | 0.43   | -0.22 ± 0.19                       | 0.25 |  |
| Autumn                     | 198 | 1.19 ± 0.50           | 0.02   | -0.08 ± 0.15                 | 0.61  | 4.88 ± 3.31        | 0.14  | 4.16 ± 2.39                    | 0.08   | -0.07 ± 0.13                       | 0.59 |  |
| Winter                     | 173 | 0.67 ± 0.52           | 0.20   | -0.14 ± 0.16                 | 0.36  | 3.71 ± 3.42        | 0.28  | 2.43 ± 2.47                    | 0.33   | 0.03 ± 0.14                        | 0.81 |  |
| <i>Sex</i>                 |     |                       |        |                              |       |                    |       |                                |        |                                    |      |  |
| Men                        | 267 | Referent              |        | Referent                     |       | Referent           |       | Referent                       |        | Referent                           |      |  |
| Women                      | 299 | 1.39 ± 0.46           | 0.003  | -0.44 ± 0.14                 | 0.001 | 9.6 ± 3.00         | 0.002 | 5.92 ± 2.16                    | 0.006  | 0.08 ± 0.12                        | 0.51 |  |
| <i>Smoking</i>             |     |                       |        |                              |       |                    |       |                                |        |                                    |      |  |
| Non smoker                 | 174 | Referent              |        | Referent                     |       | Referent           |       | Referent                       |        | Referent                           |      |  |
| Former smoker              | 362 | 0.32 ± 0.44           | 0.47   | -0.02 ± 0.13                 | 0.88  | 1.98 ± 2.87        | 0.49  | 1.79 ± 2.07                    | 0.39   | -0.01 ± 0.12                       | 0.91 |  |
| Current smoker             | 30  | -0.99 ± 0.91          | 0.28   | 0.27 ± 0.27                  | 0.32  | -4.85 ± 6.01       | 0.42  | -3.56 ± 4.33                   | 0.41   | -0.11 ± 0.24                       | 0.65 |  |
| <i>Alcohol consumption</i> |     |                       |        |                              |       |                    |       |                                |        |                                    |      |  |
| Never drinks alcohol       | 77  | Referent              |        | Referent                     |       | Referent           |       | Referent                       |        | Referent                           |      |  |

|                                    |     |              |        |              |       |              |        |               |        |              |      |
|------------------------------------|-----|--------------|--------|--------------|-------|--------------|--------|---------------|--------|--------------|------|
| Drinks 1-4 times per month         | 191 | -0.09 ± 0.61 | 0.89   | -0.01 ± 0.18 | 0.94  | -3.76 ± 4.02 | 0.35   | 0.12 ± 2.90   | 0.97   | 0.13 ± 0.16  | 0.43 |
| Drinks 2-4 times per week          | 298 | 0.51 ± 0.60  | 0.40   | 0.06 ± 0.18  | 0.75  | 3.25 ± 3.95  | 0.41   | 2.48 ± 2.85   | 0.38   | -0.10 ± 0.16 | 0.53 |
| <i>Health status</i>               |     |              |        |              |       |              |        |               |        |              |      |
| Not disabled                       | 209 | Referent     |        | Referent     |       | Referent     |        | Referent      |        | Referent     |      |
| Disabled                           | 121 | -1.36 ± 0.53 | 0.01   | 0.12 ± 0.16  | 0.45  | -2.34 ± 3.49 | 0.50   | -6.24 ± 2.52  | 0.01   | 0.05 ± 0.14  | 0.73 |
| Severely disabled                  | 236 | -2.01 ± 0.46 | <0.001 | 0.37 ± 0.14  | 0.01  | -8.04 ± 3.00 | 0.01   | -10.33 ± 2.16 | <0.001 | -0.04 ± 0.12 | 0.74 |
| <i>Prevalent CVD, DM or cancer</i> |     |              |        |              |       |              |        |               |        |              |      |
| Not present                        | 247 | Referent     |        | Referent     |       | Referent     |        | Referent      |        | Referent     |      |
| Present                            | 319 | -1.13 ± 0.40 | 0.005  | 0.32 ± 0.12  | 0.01  | -4.94 ± 2.61 | 0.06   | -5.05 ± 1.88  | 0.008  | -0.17 ± 0.11 | 0.12 |
| <i>Marital status</i>              |     |              |        |              |       |              |        |               |        |              |      |
| Living alone                       | 194 | Referent     |        | Referent     |       | Referent     |        | Referent      |        | Referent     |      |
| Living with parnter                | 372 | 1.60 ± 0.44  | <0.001 | -0.33 ± 0.13 | 0.012 | 9.97 ± 2.90  | <0.001 | 7.44 ± 2.09   | <0.001 | 0.03 ± 0.12  | 0.77 |
| <i>Sleep medication</i>            |     |              |        |              |       |              |        |               |        |              |      |
| Not using                          | 477 | Referent     |        | Referent     |       | Referent     |        | Referent      |        | Referent     |      |
| Using                              | 89  | -0.21 ± 0.53 | 0.69   | 0.18 ± 0.16  | 0.25  | -0.32 ± 3.52 | 0.93   | -0.34 ± 2.54  | 0.89   | -0.19 ± 0.14 | 0.18 |

**Supplementary Figure 1.** Self-reported proportion of participants by physical activity type

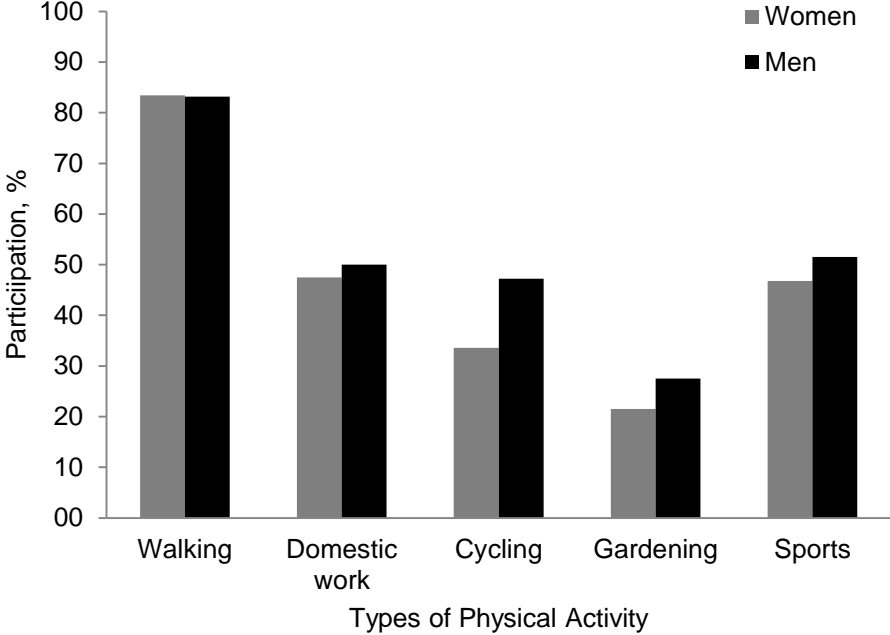

Supplement: NIHMS79970-supplement-Supplementary_Material.pdf [file NIHMS79970-supplement-Supplementary_Material.pdf]
